# Supplementary material
Source: publisher figshare collection journal article supplement (https://karger.figshare.com/articles/dataset/_/5960920)

# Intra-RR

Primary teeth

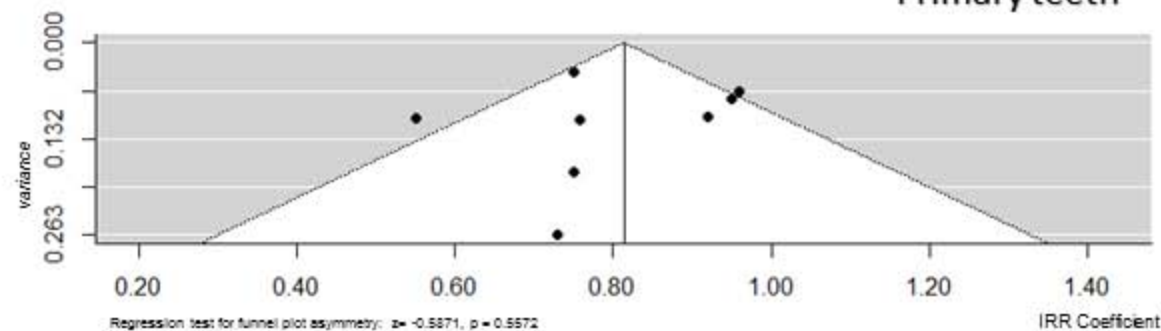

Permanent teeth

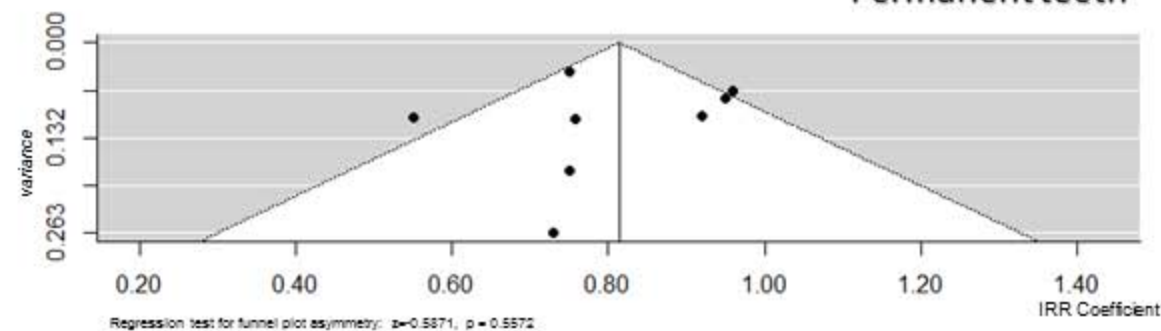

All teeth – Activity assessment

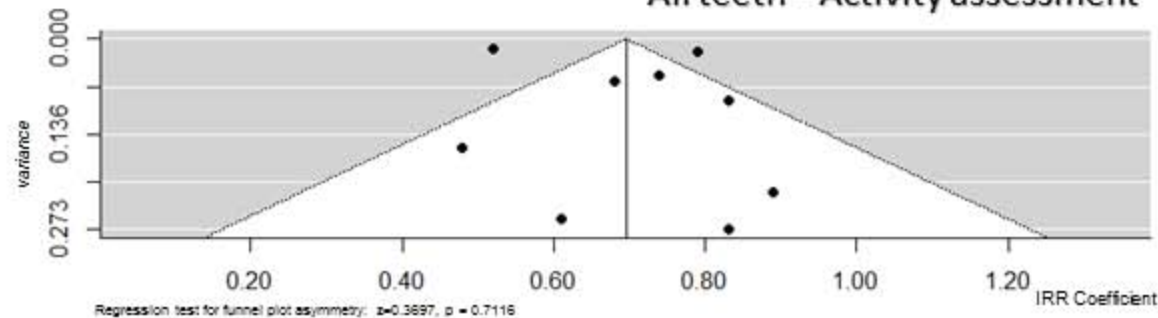

# Inter-RR

Primary teeth

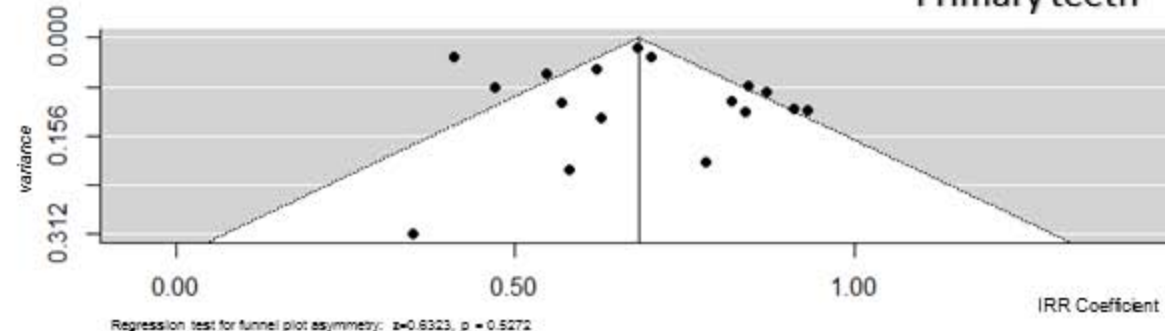

Permanent teeth

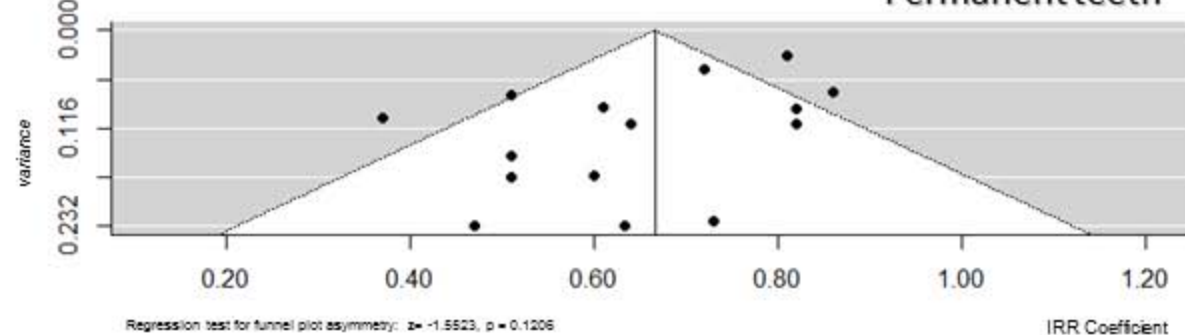

All teeth – Activity assessment

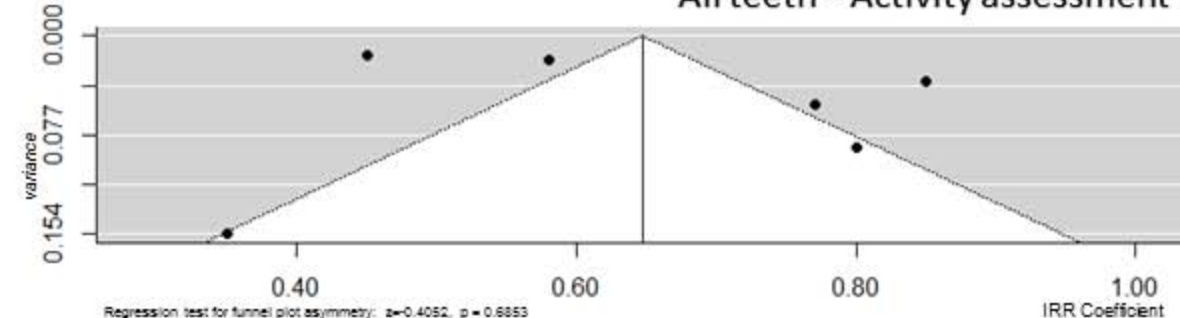

Supplement: Supplementary file 2 [file 1]
