# Supplementary material
Source: publisher figshare collection journal article supplement (https://karger.figshare.com/articles/dataset/_/5960920)
Supplement: Supplementary file 3 [file 1]

Archive with 12 entries (12 files):
- 486429sm_3.pdf
- 486429sm_9.pdf
- 486429sm_8.pdf
- 486429sm_7.pdf
- 486429sm_6.pdf
- 486429sm_5.pdf
- 486429sm_2.pdf
- 486429sm_11.pdf
- 486429sm_12.pdf
- 486429sm_1.pdf
- 486429sm_4.pdf
- 486429sm_10.pdf
