# Supplementary material
Source: publisher figshare collection journal article supplement (https://karger.figshare.com/articles/dataset/_/5960920)
Supplement: Supplementary file 3 [file 1 › 486429sm_1.pdf]

| Review aim                                                       | Search strategy                                                                                                                                                                                                                                                                                                                                                                                                                                                                                                                                                                                                                                                                                                                                                                                                                           |
|------------------------------------------------------------------|-------------------------------------------------------------------------------------------------------------------------------------------------------------------------------------------------------------------------------------------------------------------------------------------------------------------------------------------------------------------------------------------------------------------------------------------------------------------------------------------------------------------------------------------------------------------------------------------------------------------------------------------------------------------------------------------------------------------------------------------------------------------------------------------------------------------------------------------|
| Accuracy on caries assessment (1)                                | <p>((((((((((((((((((sensitive and specificity) OR sensitivity and specificity/standards) OR specificity) OR screening) OR false positive) OR false negative) OR accuracy) OR predictive value of tests) OR predictive value) OR predictive value of tests/standards) OR predictive values of tests) OR predictive values) OR reference value) OR reference values) OR reference values/standards))) OR (((((((((((((((roc) OR roc analyses) OR roc analysis) OR roc and) OR roc area) OR roc auc) OR roc characteristics) OR roc curve) OR roc curve method) OR roc curves) OR roc estimated) OR roc evaluation) OR likelihood ratio))))</p> <p>AND</p> <p>(dental caries[MeSH Terms] OR caries OR carious)</p> <p>AND</p> <p>(system OR clinical OR clinic OR exam OR exams OR examination OR examinations OR visual OR inspection)</p> |
| Use of activity assessment methods in conjunction with ICDAS (2) | <p>((("dental caries"[MeSH Terms] OR ("dental"[All Fields] AND "caries"[All Fields]) OR "dental caries"[All Fields] OR "caries"[All Fields]) OR "dental caries"[MeSH Terms]) AND lesion[All Fields]) AND icdas[All Fields]) AND ("activity"[All Fields]) OR status[All Fields])</p>                                                                                                                                                                                                                                                                                                                                                                                                                                                                                                                                                       |
