# Supplementary material
Source: publisher figshare collection journal article supplement (https://karger.figshare.com/articles/dataset/_/5960920)
Supplement: Supplementary file 3 [file 1 › 486429sm_7.pdf]

**Table S1** – Summary characteristics of studies included which tested the ICDAS in assessment of caries lesion severity

| Study                       | Reference | Type of Tooth | Surface    | Setting      | Examiner<br>(experience/training*) | Sample size | D1   |      | D3   |      |
|-----------------------------|-----------|---------------|------------|--------------|------------------------------------|-------------|------|------|------|------|
|                             |           |               |            |              |                                    |             | Sens | Spec | Sens | Spec |
| Achilleos EE et al, 2013    | histology | permanent     | Occlusal   | laboratorial | intermediate + training            | 38          | 0.80 | 0.50 | -    | -    |
| Braga MM et al, 2009b       | histology | primary       | approximal | laboratorial | intermediate + training            | 131         | 0.89 | 0.84 | 0.50 | 0.97 |
| Braga MM et al, 2009a       | histology | primary       | Occlusal   | laboratorial | experienced                        | 98          | 0.92 | 0.79 | 0.78 | 0.94 |
| Braga MM et al, 2010        | histology | primary       | Occlusal   | clinical     | experienced                        | 50          | 0.85 | 0.79 | 0.64 | 0.82 |
| Bussaneli DG et al, 2015    | histology | primary       | Occlusal   | laboratorial | experienced                        | 77          | 0.87 | 0.45 | 0.42 | 0.95 |
| Castilho LS et al., 2016    | histology | permanent     | Occlusal   | clinical     | intermediate + training            | 43          | 0.71 | 0.50 | 1.00 | 0.82 |
| Chawla N et al, 2012        | histology | primary       | approximal | laboratorial | experienced                        | 135         | 0.26 | 0.92 | 0.36 | 0.57 |
| Cotta F et al., 2015        | histology | permanent     | Occlusal   | clinical     | intermediate + training            | 49          | 0.7  | 0.44 | 0.57 | 0.95 |
| Diniz MB et al, 2009        | histology | permanent     | Occlusal   | laboratorial | Experienced                        | 163         | 1.00 | 0.99 | 0.69 | 1.00 |
| Diniz MB et al, 2011        | histology | permanent     | Occlusal   | laboratorial | Experienced                        | 104         | 0.79 | 0.83 | -    | -    |
| Diniz MB et al, 2012        | histology | permanent     | Occlusal   | clinical     | Experienced                        | 105         | 0.93 | 0.60 | 0.52 | 0.77 |
| Ekstrand KR et al, 2011 (1) | histology | primary       | approximal | laboratorial | intermediate + training            | 112         | 1.00 | 0.60 | 0.93 | 0.97 |

|                            |                        |           |            |              |                           |      |      |      |      |      |
|----------------------------|------------------------|-----------|------------|--------------|---------------------------|------|------|------|------|------|
| Ekstrand KR et al,2011 (2) | histology              | permanent | approximal | laboratorial | intermediate + training   | 151  | 1.00 | 0.48 | 0.87 | 0.97 |
| Ekstrand KR et al., 2007   | histology              | permanent | Occlusal   | laboratorial | Experienced               | 139  | 0.98 | 0.92 | 0.91 | 0.94 |
| Freitas LA et al., 2016    | histology              | primary   | Proximal   | clinical     | Unclear                   | 166  | 0.55 | 0.73 | -    | -    |
| Gomes J et al, 2013        | histology              | permanent | Occlusal   | laboratorial | intermediate + training   | 112  | 0.90 | 0.87 | 0.87 | 0.95 |
| Graye M et al, 2012        | histology              | permanent | Occlusal   | laboratorial | intermediate              | 41   | 0.72 | 0.65 | 0.68 | 1.00 |
| Holtzman JS et al, 2014    | histology              | permanent | Occlusal   | laboratorial | intermediate + training   | 120  | 0.92 | 0.83 | -    | -    |
| Jablonski-Momeni A, 2008   | histology              | permanent | Occlusal   | laboratorial | Experienced               | 93   | 0.71 | 0.91 | 0.79 | 0.90 |
| Jablonski-Momeni A, 2012   | operative intervention | permanent | Occlusal   | laboratorial | Experienced               | 84   | 1.00 | 1.00 | 0.70 | 0.96 |
| Jablonski-Momeni A, 2013   | histology              | permanent | Occlusal   | laboratorial | intermediate              | 101  | 0.97 | 0.80 | 0.71 | 0.96 |
| Jallad M et al., 2015      | histology              | permanent | Occlusal   | laboratorial | unclear + training        | 60   | 0.82 | 0.86 | -    | -    |
| Ko HY et al, 2015          | histology              | permanent | Proximal   | laboratorial | intermediate + training   | 95   | 0.80 | 0.68 | 0.64 | 0.68 |
| Kuhnisch J et al., 2016    | operative intervention | permanent | Proximal   | clinical     | experienced               | 127  | -    | -    | 0.02 | nc   |
| Luz PB et al., 2015        | visual examination     | permanent | Occlusal   | clinical     | undergraduated + training | 2861 | 0.46 | 0.97 | 0.50 | 0.98 |
| Markowitz K et al, 2013    | histology              | permanent | Occlusal   | laboratorial | intermediate              | 31   | -    | -    | 0.65 | 0.82 |
| Matos R et al, 2011        | operative intervention | primary   | Occlusal   | clinical     | intermediate + training   | 407  | -    | -    | 0.86 | 0.98 |
| Melo M et al., 2015        | operative intervention | permanent | Occlusal   | clinical     | unclear                   | 32   | -    | -    | 0.75 | 0.75 |

| Table 1. Summary of the studies included in the meta-analysis |                      |            |                |                  |                           |                |                       |                                |                                       |                               |
|---------------------------------------------------------------|----------------------|------------|----------------|------------------|---------------------------|----------------|-----------------------|--------------------------------|---------------------------------------|-------------------------------|
| Study                                                         | Study design         | Study type | Study location | Study population | Study outcome             | Study size (n) | Study effect size (d) | Study confidence interval (CI) | Study heterogeneity (I <sup>2</sup> ) | Study overall effect size (d) |
| Mitropoulos P et al, 2010                                     | histology            | permanent  | approximal     | laboratorial     | experienced               | 40             | 0.96                  | 0.50                           | 1.00                                  | 0.41                          |
| Neuhaus KW et al, 2011                                        | histology            | primary    | Occlusal       | laboratorial     | experienced               | 37             | 0.82                  | 0.65                           | 0.83                                  | 0.85                          |
| Neuhaus KW et al, 2015a                                       | histology            | permanent  | approximal     | laboratorial     | intermediate + training   | 118            | 0.33                  | 0.84                           | 0.04                                  | 0.89                          |
| Neuhaus KW et al., 2015b <sup>(1)</sup>                       | histology            | permanent  | Occlusal       | laboratorial     | experienced               | 98             | 0.74                  | 0.58                           | 0.47                                  | 0.84                          |
| Neuhaus KW et al., 2015b <sup>(2)</sup>                       | histology            | permanent  | Occlusal       | laboratorial     | undergraduated + training | 98             | 0.83                  | 0.26                           | 0.60                                  | 0.78                          |
| Noaves TF et al, 2012                                         | histology            | primary    | Occlusal       | laboratorial     | experienced               | 113            | 0.97                  | 0.18                           | 0.53                                  | 0.99                          |
| Novaes TF et al, 2009                                         | visual examination** | primary    | approximal     | clinical         | intermediate + training   | 621            | 0.21                  | 0.95                           | 0.30                                  | 1.00                          |
| Novaes TF et al, 2010                                         | visual examination** | primary    | approximal     | clinical         | experienced               | 592            | 0.66                  | 0.73                           | 0.23                                  | 0.99                          |
| Ozkan G et al., 2015                                          | histology            | permanent  | Occlusal       | laboratorial     | experienced               | 60             | 0.94                  | 0.55                           | 0.74                                  | 0.97                          |
| Ozturk & Sinanoglu, 2015                                      | histology            | permanent  | Occlusal       | laboratorial     | experienced               | 121            | -                     | -                              | 0.76                                  | 0.91                          |
| Parviainen H et al, 2013                                      | histology            | permanent  | Occlusal       | laboratorial     | experienced               | 27             | -                     | -                              | 0.78                                  | 0.87                          |
| Patel SA et al., 2014                                         | histology            | permanent  | Occlusal       | laboratorial     | intermediate + training   | 264            | 0.92                  | 0.43                           | -                                     | -                             |
| Piovesan C et al, 2013 <sup>(1)</sup>                         | histology            | primary    | approximal     | laboratorial     | intermediate + training   | 134            | 0.66                  | 0.93                           | 0.84                                  | 0.99                          |
| Piovesan C et al, 2013 <sup>(2)</sup>                         | histology            | primary    | Smooth         | laboratorial     | intermediate + training   | 134            | 0.64                  | 0.94                           | 0.67                                  | 0.99                          |
| Piovesan C et al, 2013 <sup>(3)</sup>                         | histology            | primary    | Occlusal       | laboratorial     | intermediate + training   | 28             | 0.72                  | 0.84                           | 0.56                                  | 0.92                          |
| Rodrigues JA et al, 2013                                      | histology            | permanent  | Occlusal       | laboratorial     | intermediate              | 170            | 0.80                  | 0.64                           | 0.74                                  | 0.81                          |

|                                       |           |           |            |              |                         |     |      |      |      |      |
|---------------------------------------|-----------|-----------|------------|--------------|-------------------------|-----|------|------|------|------|
| Rodrigues JA et al, 2008              | histology | permanent | Occlusal   | laboratorial | experienced             | 119 | 0.95 | 1.00 | 0.65 | 0.73 |
| Shoaib L et al, 2009 <sup>(1)</sup>   | histology | primary   | Occlusal   | laboratorial | experienced             | 107 | 0.75 | 0.90 | 0.63 | 0.93 |
| Shoaib L et al, 2009 <sup>(2)</sup>   | histology | primary   | approximal | laboratorial | experienced             | 224 | 0.66 | 0.85 | 0.58 | 0.94 |
| Souza JF et al, 2013                  | histology | primary   | Occlusal   | laboratorial | experienced             | 79  | 0.75 | 0.74 | 0.94 | 0.64 |
| Soviero VM et al, 2012                | histology | primary   | approximal | laboratorial | experienced             | 48  | 0.82 | 0.88 | 0.44 | 0.97 |
| Teo TK et al, 2014 <sup>(1)</sup>     | histology | primary   | Occlusal   | clinical     | experienced             | 64  | 0.89 | 0.61 | 0.95 | 0.61 |
| Teo TK et al, 2014 <sup>(2)</sup>     | histology | primary   | occlusal   | laboratorial | experienced             | 102 | 0.91 | 0.71 | 0.98 | 0.60 |
| Zandona AG et al, 2009 <sup>(1)</sup> | histology | permanent | Occlusal   | laboratorial | novice + training       | 60  | 0.92 | 0.86 | 1.00 | 0.86 |
| Zandona AG et al, 2009 <sup>(2)</sup> | histology | permanent | Occlusal   | laboratorial | intermediate + training | 60  | 0.90 | 0.86 | 0.97 | 0.86 |
| Zandona AG et al, 2009 <sup>(3)</sup> | histology | permanent | Occlusal   | laboratorial | experienced             | 60  | 0.91 | 0.86 | 0.97 | 0.86 |

Sens= sensitivity, Spec= Specificity

\* if training is not reported is because it was not mentioned in the paper/ \*\*after tooth separation/nc=non calculable

Different numbers between parentheses for a same study represent different samples or settings.

*See in the Appendix the complete references of included papers.*
