# Supplementary material
Source: publisher figshare collection journal article supplement (https://karger.figshare.com/articles/dataset/_/5960920)
Supplement: Supplementary file 3 [file 1 › 486429sm_8.pdf]

**Table S2** – Summary characteristics of studies included which tested the ICDAS in association with other systems for caries lesion activity assessment

| Study                           | Activity Assessment System | Surface    | Type of tooth     | N examiners | Type of examiner      | Study purpose                              |
|---------------------------------|----------------------------|------------|-------------------|-------------|-----------------------|--------------------------------------------|
| Freitas LA et al., 2016         | LAA                        | approximal | primary           | 1           | intermediate+training | criterion validation                       |
| Floriano I et al., 2015         | LAA                        | occlusal   | primary           | 1           | intermediate+training | methods comparison                         |
| Oliveira RS et al., 2015 (1)    | LAA                        | occlusal   | permanent         | 1           | intermediate+training | methods comparison                         |
| Oliveira RS et al., 2015 (2)    | colour/lustre/roughness    | occlusal   | permanent         | 1           | intermediate+training | methods comparison                         |
| Cotta F et al., 2015            | LAA                        | occlusal   | permanent         | 1           | intermediate+training | criterion validation                       |
| Guedes RS et al., 2014          | colour/lustre/roughness    | all        | primary           | 15          | intermediate+training | predictive validation                      |
| Tikhonova et al., 2014          | LAA                        | all        | permanent         | 4           | intermediate+training | methods comparison                         |
| Ferreira Zandoná A et al., 2012 | lustre/texture/location    | all        | permanent         | 2           | intermediate+training | investigate caries progression             |
| Nelson S et al., 2011           | not described              | all        | permanent         | 3           | intermediate+training | checking repeatability                     |
| Braga MM et al., 2010           | LAA                        | occlusal   | primary           | 2           | experienced           | criterion validation                       |
| Varma S et al., 2008            | LAA                        | all        | permanent         | 2           | intermediate+training | investigate caries predictors              |
| Ekstrand KR et al., 2007        | LAA                        | all        | primary/permanent | 1           | experienced           | devising the index<br>criterion validation |

Different numbers between parentheses for a same study represent different samples or settings.

*See in the Appendix the complete references of included papers.*
