# Supplementary material
Source: publisher figshare collection journal article supplement (https://karger.figshare.com/articles/dataset/_/5960920)
Supplement: Supplementary file 3 [file 1 › 486429sm_9.pdf]

**Table S3** – Summary characteristics of included studies which used concurrent validation based on pH.

| Study                    | Reference           | Surface    | Type of tooth     | N<br>surfaces | N<br>patient | Sens | Spec | Acur | DOR    |
|--------------------------|---------------------|------------|-------------------|---------------|--------------|------|------|------|--------|
| Freitas LA et al., 2016  | methyl red dye      | approximal | primary           | 113           | 56           | 0.52 | 0.65 | 0.59 | 1.934  |
| Cotta F et al., 2015     | methyl red dye      | occlusal   | permanent         | 49            | 33           | 0.78 | 0.4  | 0.51 | 2.444  |
| Braga MM et al., 2010    | methyl red dye      | occlusal   | primary           | 50            | 30           | 0.78 | 0.16 | 0.67 | 0.733  |
| Ekstrand KR et al., 2007 | impression material | all        | primary/permanent | 176           | 26           | 0.84 | 0.82 | 0.84 | 21.956 |

Sens= sensitivity. Spec= Specificity. Acur=Accuracy (number of true results/number of assessments)
