# Supplementary material
Source: publisher figshare collection journal article supplement (https://karger.figshare.com/articles/dataset/_/5960920)
Supplement: Supplementary file 3 [file 1 › 486429sm_10.pdf]

|                                                                                      |          | Guedes et al., 2014              | Ferreira Zandoná et al., 2012 |
|--------------------------------------------------------------------------------------|----------|----------------------------------|-------------------------------|
| Sample size at baseline                                                              |          | 639 patients                     | 565 patients                  |
| Dentition/Age                                                                        |          | Primary/1-4 years-old            | Permanent/5-13 years-old      |
| Follow-up                                                                            |          | 2-year study                     | 4-year-study                  |
| Mean follow-up                                                                       |          | 849.8 days (95.1)                | -                             |
| Sample size re-examined                                                              |          | 469 patients                     | 338 patients                  |
| Follow-up rate                                                                       |          | 73.4%                            | 59.8%                         |
|                                                                                      |          | Re-examined sample               |                               |
|                                                                                      |          | 31,496 surfaces*                 | 41,031 surfaces**             |
| Baseline status                                                                      | Sound    | 29,336* (93.1%)                  | 37,549 (91.5%)                |
|                                                                                      | Inactive | 324 (1.1%)                       | 2,924 (7.1%)                  |
|                                                                                      | Active   | 1836 (5.8%)                      | 558 (1.4%)                    |
|                                                                                      |          | Caries progression after 2 years |                               |
| Sound surfaces                                                                       |          | 1.9%                             | 3%                            |
| Non-cavitated                                                                        | Inactive | 6.2%                             | 11.5%                         |
|                                                                                      | Active   | 9.9%                             | 11.5%#                        |
| Cavitated                                                                            | Inactive | 34.3%                            | 25%                           |
|                                                                                      | Active   | 47.4%                            | 46.5%                         |
| * data extracted from Guedes et al., 2015 (ICDAS scores 0-3), a complementary study. |          |                                  |                               |
| ** including only erupted surfaces at baseline, ICDAS scores 0-4                     |          |                                  |                               |
| # different rates were observed if only score 2 lesions were included.               |          |                                  |                               |
