# Supplementary material
Source: publisher figshare collection journal article supplement (https://karger.figshare.com/articles/dataset/_/5960920)
Supplement: Supplementary file 3 [file 1 › 486429sm_12.pdf]

## APPENDIX

### LIST OF REFERENCES

#### *INCLUDED STUDIES*

Achilleos EE, Rahiotis C, Kakaboura A, Vougiouklakis G: Evaluation of a new fluorescence-based device in the detection of incipient occlusal caries lesions. *Lasers Med Sci* 2013;28:193-201.

Braga MM, Ekstrand KR, Martignon S, Imparato JC, Ricketts DN, Mendes FM: Clinical Performance of Two Visual Scoring Systems in Detecting and Assessing Activity Status of Occlusal Caries in Primary Teeth. *Caries Res* 2010;44:300-308.

Braga MM, Mendes FM, Martignon S, Ricketts DN, Ekstrand KR: In vitro Comparison of Nyvad's System and ICDAS-II with Lesion Activity Assessment for Evaluation of Severity and Activity of Occlusal Caries Lesions in Primary Teeth. *Caries Res* 2009a;43:405-412.

Braga MM, Morais CC, Nakama RC, Leamari VM, Siqueira WL, Mendes FM: In vitro performance of methods of approximal caries detection in primary molars. *Oral Surg Oral Med Oral Pathol Oral Radiol Endod* 2009b;108:e35-41.

Bussanelli DG, Boldieri T, Diniz MB, Rivera LM, Santos-Pinto L, Cordeiro Rde C: Influence of professional experience on detection and treatment decision of occlusal caries lesions in primary teeth. *Int J Paediatr Dent* 2015;25:418-427.

Castilho LS, Cotta FV, Bueno AC, Moreira AN, Ferreira EF, Magalhaes CS: Validation of DIAGNOdent laser fluorescence and the International Caries Detection and Assessment System (ICDAS) in diagnosis of occlusal caries in permanent teeth: an in vivo study. *Eur J Oral Sci* 2016;124:188-194.

Chawla N, Messer LB, Adams GG, Manton DJ: An in vitro comparison of detection methods for approximal carious lesions in primary molars. *Caries Res* 2012;46:161-169.

Cotta F, de Castilho LS, Moreira AN, Paiva SM, Ferreira EF, Ferreira LC, Magalhaes CS: Lesion Activity Assessment (LAA) in Conjunction With International Caries Detection and Assessment System (ICDAS) for Occlusal Caries Diagnosis in Permanent Teeth. *Oper Dent* 2015;40:E189-196.

Diniz MB, Boldieri T, Rodrigues JA, Santos-Pinto L, Lussi A, Cordeiro RC: The performance of conventional and fluorescence-based methods for occlusal caries detection: an in vivo study with histologic validation. *J Am Dent Assoc* 2012;143:339-350.

Diniz MB, Lima LM, Eckert G, Zandona AG, Cordeiro RC, Pinto LS: In vitro evaluation of ICDAS and radiographic examination of occlusal surfaces and their association with treatment decisions. *Oper Dent* 2011;36:133-142.

Diniz MB, Rodrigues JA, Hug I, Cordeiro Rde C, Lussi A: Reproducibility and accuracy of the ICDAS-II for occlusal caries detection. *Community Dent Oral Epidemiol* 2009;37:399-404.

Ekstrand KR, Luna LE, Promisiero L, Cortes A, Cuevas S, Reyes JF, Torres CE, Martignon S: The reliability and accuracy of two methods for proximal caries detection and depth on directly visible proximal surfaces: an in vitro study. *Caries Res* 2011;45:93-99.

Ekstrand KR, Martignon S, Ricketts DJ, Qvist V: Detection and activity assessment of primary coronal caries lesions: a methodologic study. *Oper Dent* 2007;32:225-235.

Ferreira Zandona A, Santiago E, Eckert GJ, Katz BP, Pereira de Oliveira S, Capin OR, Mau M, Zero DT: The natural history of dental caries lesions: a 4-year observational study. *J Dent Res* 2012;91:841-846.

Floriano I, Bonini GC, Matos R, Novaes TF, Ekstrand KR, Mendes FM, Braga MM: How different do visuo-tactile criteria assess caries lesions activity status on occlusal surfaces? *Oral Dis* 2015;21:299-307.

Freitas LA, Santos MT, Guare RO, Lussi A, Diniz MB: Association Between Visual Inspection, Caries Activity Status, and Radiography with Treatment Decisions on Approximal Caries in Primary Molars. *Pediatr Dent* 2016;38:140-147.

Gomez J, Zakian C, Salsone S, Pinto SC, Taylor A, Pretty IA, Ellwood R: In vitro performance of different methods in detecting occlusal caries lesions. *J Dent* 2013;41:180-186.

Graye M, Markowitz K, Strickland M, Guzy G, Burke M, Houpt M: In vitro evaluation of the Spectra early caries detection system. *J Clin Dent* 2012;23:1-6.

Guedes RS, Piovesan C, Ardenghi TM, Emmanuelli B, Braga MM, Ekstrand KR, Mendes FM: Validation of Visual Caries Activity Assessment: A 2-yr Cohort Study. *J Dent Res* 2014;93:101S-107S.

Holtzman JS, Ballantine J, Fontana M, Wang A, Calantog A, Benavides E, Gonzalez-Cabezas C, Chen Z, Wilder-Smith P: Assessment of early occlusal caries pre- and post-sealant application--an imaging approach. *Lasers Surg Med* 2014;46:499-507.

Jablonski-Momeni A, Liebegall F, Stoll R, Heinzl-Gutenbrunner M, Pieper K: Performance of a new fluorescence camera for detection of occlusal caries in vitro. *Lasers Med Sci* 2013;28:101-109.

Jablonski-Momeni A, Stachniss V, Ricketts DN, Heinzl-Gutenbrunner M, Pieper K: Reproducibility and accuracy of the ICDAS-II for detection of occlusal caries in vitro. *Caries Res* 2008;42:79-87.

Jablonski-Momeni A, Stucke J, Steinberg T, Heinzl-Gutenbrunner M: Use of ICDAS-II, Fluorescence-Based Methods, and Radiography in Detection and Treatment Decision of Occlusal Caries Lesions: An In Vitro Study. *Int J Dent* 2012;2012:371595.

Jallad M, Zero D, Eckert G, Ferreira Zandona A: In vitro Detection of Occlusal Caries on Permanent Teeth by a Visual, Light-Induced Fluorescence and Photothermal Radiometry and Modulated Luminescence Methods. *Caries Res* 2015;49:523-530.

Ko HY, Kang SM, Kim HE, Kwon HK, Kim BI: Validation of quantitative light-induced fluorescence-digital (QLF-D) for the detection of approximal caries in vitro. *J Dent* 2015;43:568-575.

Kuhnisch J, Sochtig F, Pitchika V, Laubender R, Neuhaus KW, Lussi A, Hickel R: In vivo validation of near-infrared light transillumination for interproximal dentin caries detection. *Clin Oral Investig* 2016;20:821-829.

Luz PB, Stringhini CH, Otto BR, Port AL, Zaleski V, Oliveira RS, Pereira JT, Lussi A, Rodrigues JA: Performance of undergraduate dental students on ICDAS clinical caries detection after different learning strategies. *Eur J Dent Educ* 2015;19:235-241.

Markowitz K, Rosenfeld D, Peikes D, Guzy G, Rosivack G: Effect of pit and fissure sealants on caries detection by a fluorescent camera system. *J Dent* 2013;41:590-599.

Matos R, Novaes TF, Braga MM, Siqueira WL, Duarte DA, Mendes FM: Clinical performance of two fluorescence-based methods in detecting occlusal caries lesions in primary teeth. *Caries Res* 2011;45:294-302.

Melo M, Pascual A, Camps I, Del Campo A: In vivo study of different methods for diagnosing pit and fissure caries. *J Clin Exp Dent* 2015;7:e387-391.

Mitropoulos P, Rahiotis C, Stamatakis H, Kakaboura A: Diagnostic performance of the visual caries classification system ICDAS II versus radiography and micro-computed tomography for proximal caries detection: an in vitro study. *J Dent* 2010;38:859-867.

Nelson S, Eggertsson H, Powell B, Mandelaris J, Ntragatakis M, Richardson T, Ferretti G: Dental examiners consistency in applying the ICDAS criteria for a caries prevention community trial. *Community Dent Health* 2011;28:238-242.

Neuhaus KW, Ciucchi P, Rodrigues JA, Hug I, Emerich M, Lussi A: Diagnostic performance of a new red light LED device for approximal caries detection. *Lasers Med Sci* 2015a;30:1443-1447.

Neuhaus KW, Jost F, Perrin P, Lussi A: Impact of different magnification levels on visual caries detection with ICDAS. *J Dent* 2015b;43:1559-1564.

Neuhaus KW, Rodrigues JA, Hug I, Stich H, Lussi A: Performance of laser fluorescence devices, visual and radiographic examination for the detection of occlusal caries in primary molars. *Clin Oral Investig* 2011;15:635-641.

Novaes TF, Matos R, Braga MM, Imperato JC, Raggio DP, Mendes FM: Performance of a pen-type laser fluorescence device and conventional methods in detecting approximal caries lesions in primary teeth--in vivo study. *Caries Res* 2009;43:36-42.

Novaes TF, Matos R, Gimenez T, Braga MM, MS DEB, Mendes FM: Performance of fluorescence-based and conventional methods of occlusal caries detection in primary molars - an in vitro study. *Int J Paediatr Dent* 2012;22:459-466.

Novaes TF, Matos R, Raggio DP, Imperato JC, Braga MM, Mendes FM: Influence of the discomfort reported by children on the performance of approximal caries detection methods. *Caries Res* 2010;44:465-471.

Oliveira RS, Zenkner JE, Maltz M, Rodrigues JA: Association between two visual criteria in assessing non-cavitated caries lesion activity on occlusal surfaces of permanent molars. *Clin Oral Investig* 2015;19:565-568.

Ozkan G, Kanli A, Baseren NM, Arslan U, Tatar I: Validation of micro-computed tomography for occlusal caries detection: an in vitro study. *Braz Oral Res* 2015;29:S1806-83242015000100309.

Ozturk E, Sinanoglu A: Histological validation of cone-beam computed tomography versus laser fluorescence and conventional diagnostic methods for occlusal caries detection. *Photomed Laser Surg* 2015;33:61-68.

Parviainen H, Vahanikkila H, Laitala ML, Tjaderhane L, Anttonen V: Evaluating performance of dental caries detection methods among third-year dental students. *BMC Oral Health* 2013;13:70.

Patel SA, Shepard WD, Barros JA, Streckfus CF, Quock RL: In vitro evaluation of Midwest Caries ID: a novel light-emitting diode for caries detection. *Oper Dent* 2014;39:644-651.

Piovesan C, Moro BL, Lara JS, Ardenghi TM, Guedes RS, Haddad AE, Braga MM, Mendes FM: Laboratorial training of examiners for using a visual caries detection system in epidemiological surveys. *BMC Oral Health* 2013;13:49.

Rodrigues JA, de Oliveira RS, Hug I, Neuhaus K, Lussi A: Performance of experienced dentists in Switzerland after an e-learning program on ICDAS occlusal caries detection. *J Dent Educ* 2013;77:1086-1091.

Rodrigues JA, Hug I, Diniz MB, Lussi A: Performance of fluorescence methods, radiographic examination and ICDAS II on occlusal surfaces in vitro. *Caries Res* 2008;42:297-304.

Shoaib L, Deery C, Ricketts DN, Nugent ZJ: Validity and Reproducibility of ICDAS II in Primary Teeth. *Caries Res* 2009;43:442-448.

Souza JF, Boldieri T, Diniz MB, Rodrigues JA, Lussi A, Cordeiro RC: Traditional and novel methods for occlusal caries detection: performance on primary teeth. *Lasers Med Sci* 2013;28:287-295.

Soviero VM, Leal SC, Silva RC, Azevedo RB: Validity of MicroCT for in vitro detection of proximal carious lesions in primary molars. *J Dent* 2012;40:35-40.

Teo TK, Ashley PF, Louca C: An in vivo and in vitro investigation of the use of ICDAS, DIAGNOdent pen and CarieScan PRO for the detection and assessment of occlusal caries in primary molar teeth. *Clin Oral Investig* 2014;18:737-744.

Tikhonova SM, Feine JS, Pustavoitava NN, Allison PJ: Reproducibility and diagnostic outcomes of two visual-tactile criteria used by dentists to assess caries lesion activity: a cross-over study. *Caries Res* 2014;48:126-136.

Varma S, Banerjee A, Bartlett D: An in vivo investigation of associations between saliva properties, caries prevalence and potential lesion activity in an adult UK population. *J Dent* 2008;36:294-299.

Zandona AG, Al-Shiha S, Eggertsson H, Eckert G: Student versus faculty performance using a new visual criteria for the detection of caries on occlusal surfaces: an in vitro examination with histological validation. *Oper Dent* 2009;34:598-604.
