# Supplementary material
Source: publisher figshare collection journal article supplement (https://karger.figshare.com/articles/dataset/_/5960920)

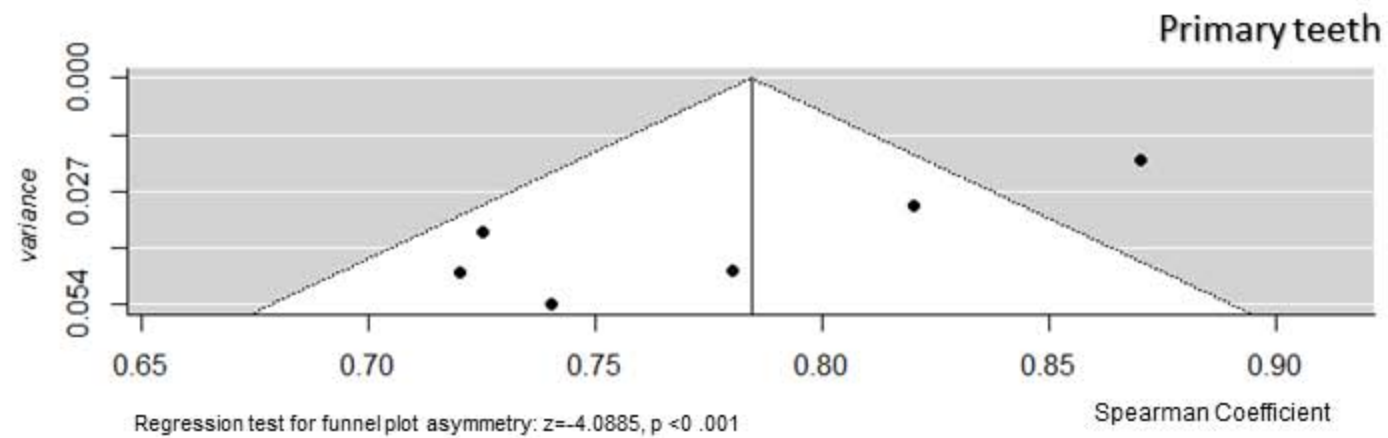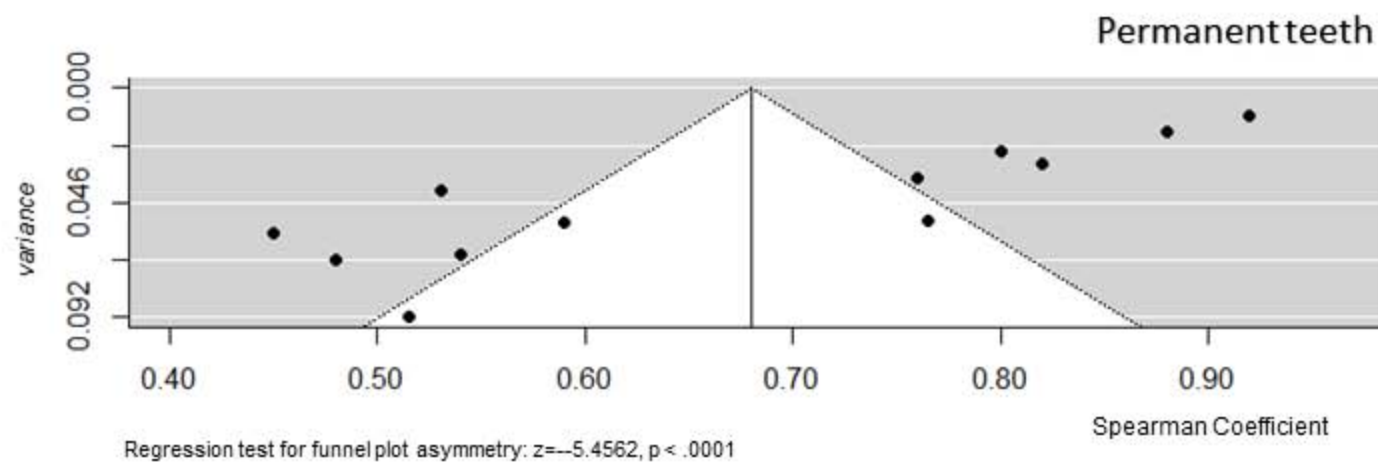

Supplement: Supplementary file 3 [file 1 › 486429sm_6.pdf]

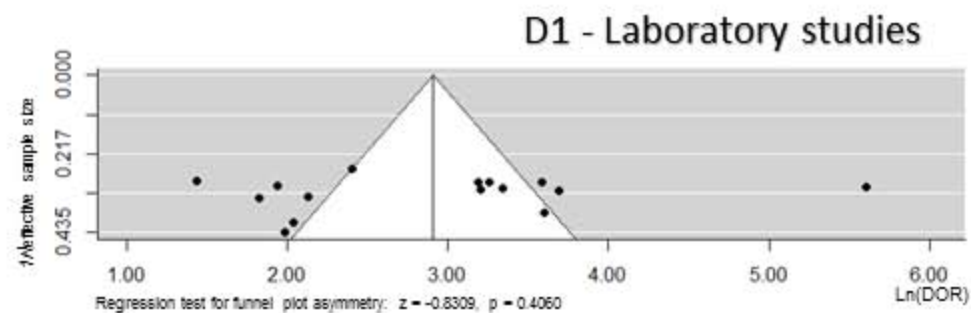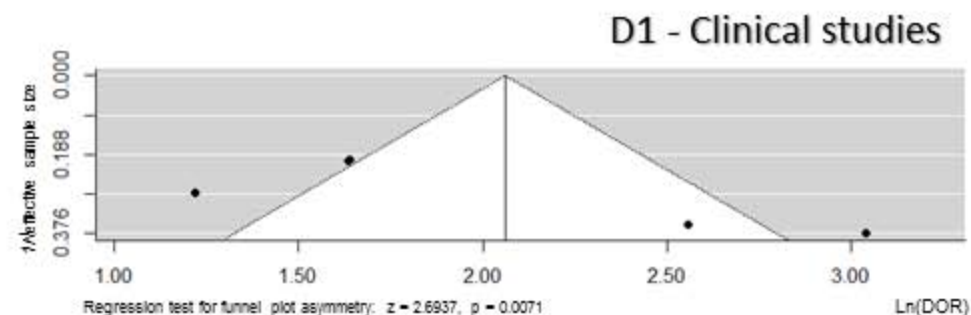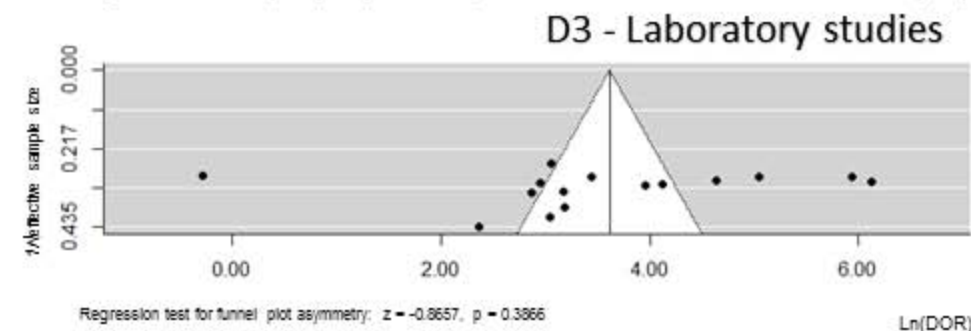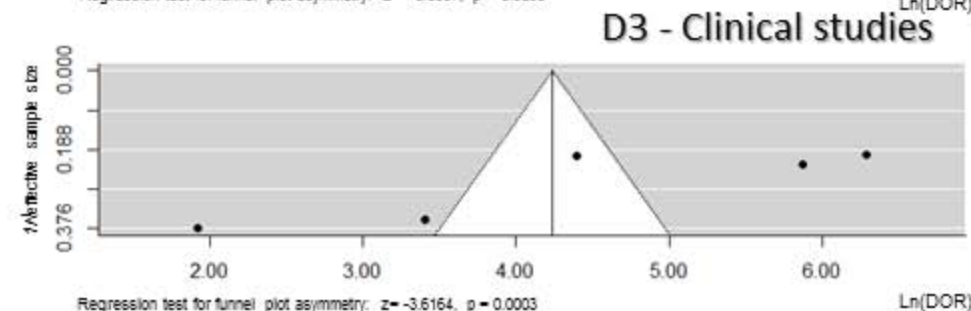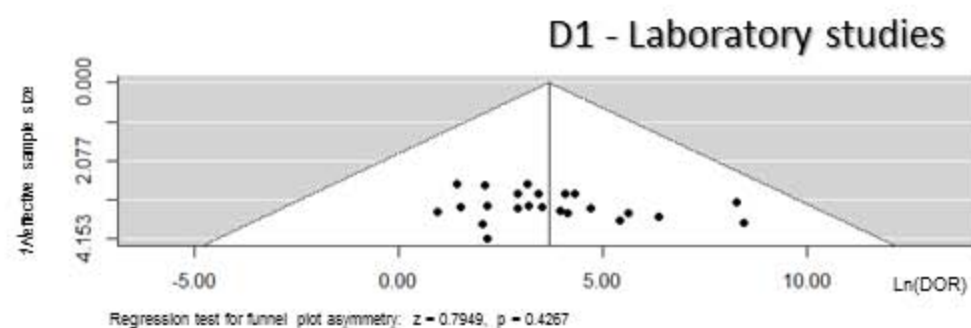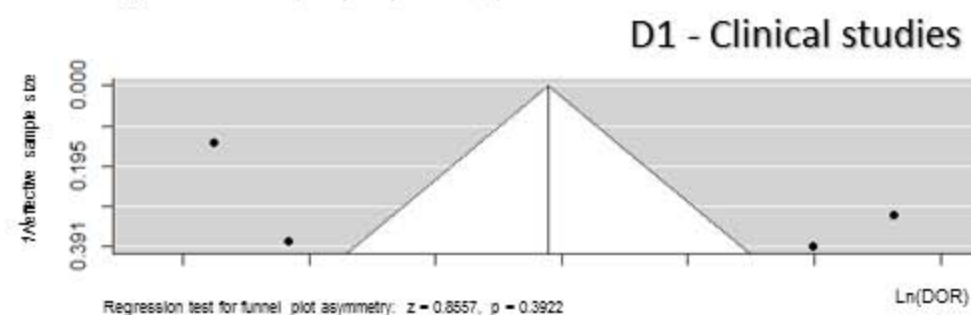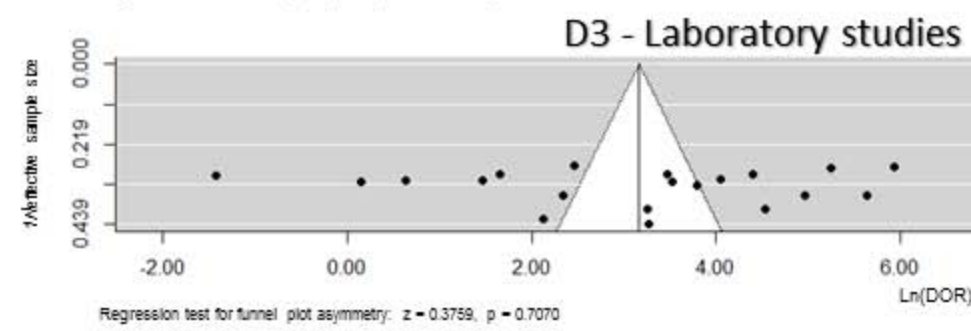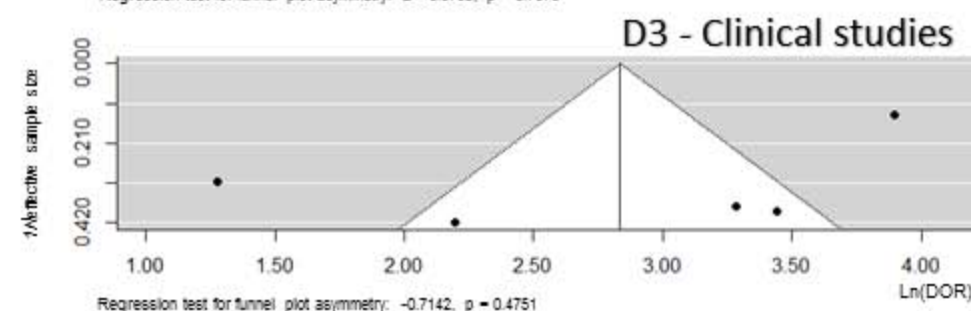

Supplement: Supplementary file 3 [file 1 › 486429sm_4.pdf]
